# Supplementary material
Source: publisher figshare collection journal article supplement (https://gsajournals.figshare.com/articles/dataset/_/11444400)
Supplement: Supplementary file 1 [file 1]

## Supporting File S2

% identity: 117/630 human Tmc1 residues identical to Tmc from *Naegleria gruberi* (18.6%)

% identity corrected for gaps: 117/(630+46) human TMC1 residues (17.3%)

CLUSTAL O (1.2.4) multiple sequence alignment

```
Human_Tmc1      MEKKIEVLKEAKKFVSENEGALGKGGKGRWFQAFKMMMAKKWAKFLRDFENFKAACVPWEN      60
Naegleria_Tmc  MRERLRQM--AKAFKEEERN-----RNKFSRAFRRLLKLWWGSHR-ATRIISHLNPFVN      50
*.:.:. : ** * .:.. :. *: : * * * .: : *: *

Human_Tmc1      KIKAIESQFGSSVASVYFLFLRWMYGVNMVLFILTFSLIMLPEYLVGLPYGSLPRKTVPRA      120
Naegleria_Tmc  SLQVIEKRFSGVATYYDFYYSVIKMNFFVAVSSFLLLILPWLLR-----PLDNWPDV      103
.:.:.*:.*:***.***: * : : :.:. : : * * : * * * * * * . . * .

Human_Tmc1      E--EASAAFGVLYDFNGLAQYSVLFYGYDNKRTIGWMNFRLPLSYFLVIGMIGYSFL      178
Naegleria_Tmc  WKLDFLMGLFGVKSNIIG--LTWFFFGGYEDRLVL-FSTVIWPFQAFVYVVFVILNFSIC      159
: . *** : : * : : * * * : : : . . * : : * : : : :

Human_Tmc1      VVLKAMT--KNIGDDGGDDNTFNFVSWKVFTSWDYLIIGNPETADNKFNSITMN--FKEA      233
Naegleria_Tmc  IVSICMSIGAKVTSVSHIDEKNTRYLEAVFNSYSFGVQSKEGVQDLQRYLATKLAEYRNA      219
:* .*: : : . . * : . : * * . : : : . * . : : . : : : : : * *

Human_Tmc1      -ITEEKAAQVEENVHLIRFLRFLANFFVFLTLGGSGYL-----IFWAVKRSQEFAQQD      285
Naegleria_Tmc  DFAKEKSAAQK-SPKELVFLVFKR----AIGIAVSGFFLVGTPVAVYFIVQYYEIIINSAF      274
: : * * * : . : : * * * : : . * * : : : : : * : : : .

Human_Tmc1      PDTLGWWEKNEVMMSLLGMFCPTLFDLFAELEDYHPLIALKWLGRIFALLLGNLYVF      345
Naegleria_Tmc  PF-----TTSVLSSTISLLFPPIISYVMVHLEGYAERATTEWNI-----      312
* . : : * : : : * : : . : . * * . * : : * :

Human_Tmc1      ILALMDEINNKIEEKLVKANITLWEANMXIKAYNASFSENST-GPPXFFVHPADXVPRG      404
Naegleria_Tmc  -----IIRTYVIKSTTVALMVRVLF-----DESDG      339
* * * * . : * . : : * * *

Human_Tmc1      PCWETMVGQEFVRLTVSDVL-----TTYVTILIGDFLRACFVR-FCNYCWCWDLEYGYPSY      459
Naegleria_Tmc  KCRQTEAGLVFWQMIWIEFAVSIFKTLIFLPVRYNLMRCITKKKTDD----DWESKRRGK      395
* : * . * * : : : . * : : : * * : : : * * .

Human_Tmc1      TEFDISGNVLALIFNQGMIMWGSFFAPSLPGINILRLHTSMYFQCWAVMCCN-VPEARVF      518
Naegleria_Tmc  VEFDVPENVIELLYRQSLIFVGMIMSPMIP IAGLFSNL-VLYFCKYLIMRVTAKFPDNPY      454
.***: * : * : * : * : * : * : * : * : * : * : * : * : * :

Human_Tmc1      KASRSNNFYLGMLLLILFLSTMPVLYMIVSLPPSFDCGPFSGKNRMFEVIGE-----TLE      573
Naegleria_Tmc  ERGKSSPFNLNMLLLTFVFLVPLGFFLF-QASGSNCGPFRASALASQOMPIEAALTALS      513
: . : * * * . * * * * : : . : * : : : . : * * * * . : : * :

Human_Tmc1      H-----DFPSWMAKILRQ-----LSNPGLVIAVILVMVLAIIYYLNATAKQKAANLDL      621
Naegleria_Tmc  LAFTFYQDENAAALNWENILFYAGHKITLGLSVVFFVIVSYFLLKYLNMFRMKYTAELRA      573
. * : : : : * * : : * * : : * * * * * * * *

Human_Tmc1      K--KKMKMQAL      630
Naegleria_Tmc  NSERKEKSQIL      584
: : * * * * *
```

% raw identity: 98/630 Human TMC1 residues identical to human ANO3/TMEM16C (15.6%)

% identity corrected for gaps: 98/(630+140) Human TMC1 residues (12.7%)

CLUSTAL O (1.2.4) multiple sequence alignment

```
Human_Tmc1 MEKKIEVLKEAKKFV---SENEGALGKGKGGK---RWFAPKMMMAKKWAKFLRDFENFKAA 54
Human_Ano3 -----IN-NGSYIAAFPPEHAGAYKSSQPIKTHGPNRHLLEYERWARWGMWYK----- 47
          ::  .::  :***  ..:  :  ::  :***::  ::

Human_Tmc1 CVPWENKIKAIESQFGSSVASYFLFLRWMYGVNMVLFILTFSLIMLPEYLGWLPYG---S 111
Human_Ano3 ----HQPLDLIRLYFGEKIGLYFAWLGWYTGMLIPAAIVGLCV-----FFYGLFTMNSQ 98
          .:  .:  *  **..:  **  : *  *  *  :  :  *  :  .:  :***  .

Human_Tmc1 LPRKTVPRAEE-----ASAANFGVLYDFNGLA-----QYSVLFY 145
Human_Ano3 VSQE-ICKATEVFMCPCLCDKNCSLQRLNDSICIYAKVTYLFDNNGGTVFFAIFMAIWATVFL 157
          :  ::  :  : *  *  .  *  .  *  *  *  *  .  .  :  :  *  *

Human_Tmc1 GYYDNKRTIGWMNFRLPLSYFLVGIMCIGYSFLVVLKAMTKNIGDDGGDDNTFNFSWKV 205
Human_Ano3 EFWKRRRS-----ILTYTWDL 173
          :  .  .  .  *  :  :  :  :  :  :  :  :  :  :  :  :  :  :  :  :

Human_Tmc1 FTSWDYLIIGNPETADNKFNS---ITMNFKEAITEEKAAQVEENVHLIRFLRFLANFFVFLT 263
Human_Ano3 I-EWEE---EEETLRPQFEAKYKMEIVNPITGKPEPHQPSSDKVTRLLVSVSGIFFMIS 229
          :  .  *  :  :  *  *  :  :  :  .  *  :  :  *  *  :  :  :  :  :  :

Human_Tmc1 LG---GSGYLIFWAVKRSQEFAQQDP-DTLGWWEKNEMNMVMSLLGMFCPTLFDLFAELE 319
Human_Ano3 LVITAVFGVVYR-LVVMQFASFKWNFIKQYQFATSA-----AAVCIN----- 273
          *  *  :  :  :  :  :  :  :  :  :  :  :  :  :  :  :  :  :

Human_Tmc1 DYHPLIALKWLGRIFALLLGNLYVFILALMDEINNKIEEEKLVKANITLWEANMXIKAY 379
Human_Ano3 -----F---IIIMLLNLAYEKIAYLLTNLE-----YPRTESEWENSFALKMF 312
          :  *  :  *  *  *  *  *  :  :  :  :  :  :  :  :  :  :  :

Human_Tmc1 NASFS-----ENSTGPPXFFVHPADXVPRGPCWETMVGQEFVRLTVSDVLT 426
Human_Ano3 LFQFVNLNSSIFYIAFFLGRFVGHGPKYKLFDRWRLEECHPS----- 355
          .  *  .  *  *  :  :  *  *  *  :

Human_Tmc1 YVTILIGDFLRACFVRFVCNYCWCWDLEYGYPSYTEFDISGNV----- 468
Human_Ano3 --GCLIDLCLQMGVIMFLKQIWNFMELGYPLIQNWWSRHKIKRGIHDASIPQWENDWNL 413
          **  *  :  .  :  *  :  *  :  *  *  *  :  :  :  :

Human_Tmc1 -----LALIFNQG---MIWMSFF-APS---LPGINILRLHTSMYFQCWAVMCC 510
Human_Ano3 QPMNLHGLMDEYLEMVLQFGFTTIFVAAPLAPLLALLNNIIEIRLDAYKFVTQWRRPL- 472
          *  :  :  :  :  *  *  :  :  *  *  *  *  *  *  :  :  :  :

Human_Tmc1 NVPEARVFKASRSNNFYLGMLLLILFLSTMPVLYMIV---S---LPPSFDCGPFSGKN- 562
Human_Ano3 --P-----ARATDIGIWLGILEGIGILAVITNAFVIAITSDYIPRFVYKYGPCANHVE 525
          *  :  .  .  :  :  *  *  *  *  *  :  :  :  :  :  :  :  :

Human_Tmc1 -----RMFEVI---G---ETLEHDFPSWMAKILRQLSNPG---LVIA 595
Human_Ano3 PSENCLKGYVNNLSLFFDLSELGMGKSGYCRYRDRGPPWSSKPYEFTLQYWHILARLA 585
          :  :  :  :  *  .  :  :  *  *  *  *  .  :  :  :

Human_Tmc1 VILV---MV-----LAIYYLNATAKGQKAANLDLKKMKMQAL----- 630
Human_Ano3 FIIIVFEHLVFGIKSFIAYLIPDVPKGLHDR-IR-REKYLQEMMYEAELEH 634
          .  *  *  :  *  :  .  *  *  :  :  :  :  *  *  :  :  :
```
